# Supplementary material for: Stochastic and deterministic processes shape bioenergy crop microbiomes along a vertical soil niche
Source: PubMed Central journal article supplement (PMC10099798; doi:10.1111/1462-2920.16269), 2022-11-24
Supplement: EMI-25-352-s001.pdf [file EMI-25-352-s001.pdf]

## Supplementary Materials

**Figure S1** Distribution of illumina sample libraries. A) Fungi soil and root communities, B) Prokaryotes soil and root communities, C) TRUE contaminant OTUs (red points) as identified using 0.5 prevalence in the negative controls using the *decontam* R package. Dotted red lines in A and B represent the overall mean for the community. Soil depth ranges, 0-10, 10-25, 25-50, and 50-100 are in cm.

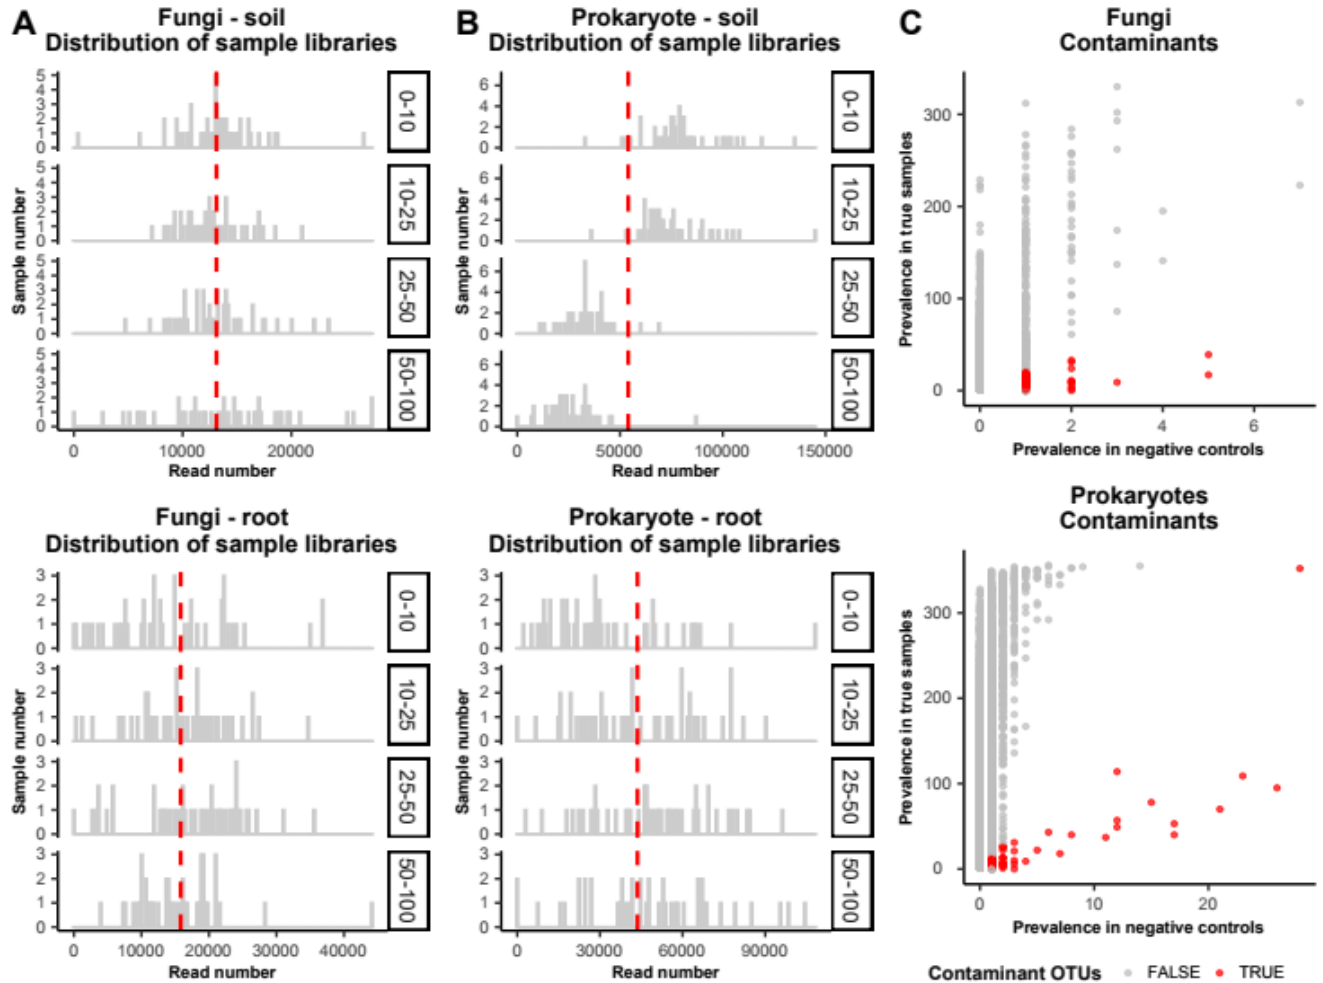

**Figure S2** Rarefaction curves for A) fungal and B) prokaryotic communities.

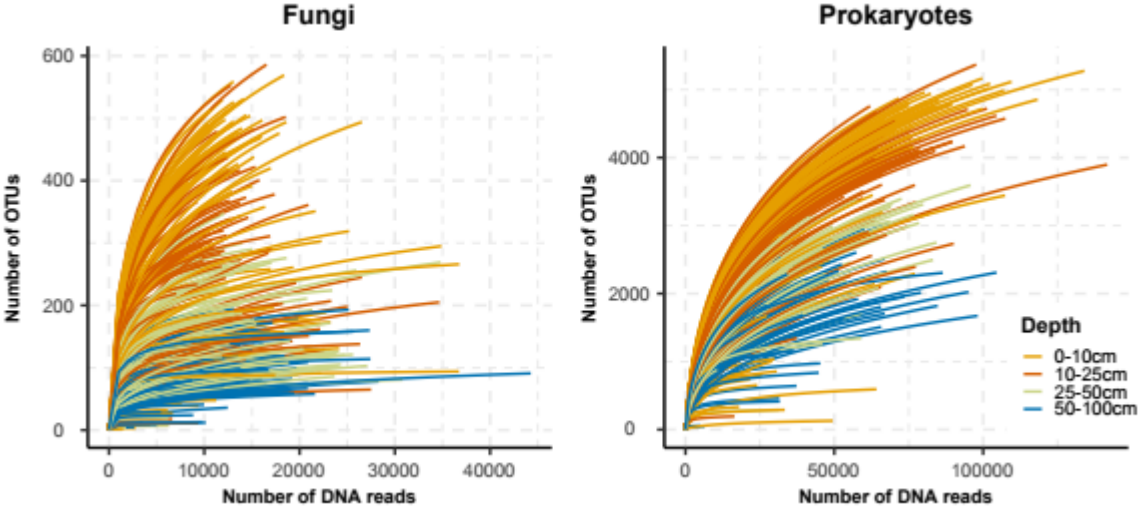

**Figure S3** Soil chemistry. A) Soil nutrients variation with increasing depth and B) spearman correlation between elements. Significant differences ( $P \leq 0.05$ ) were pairwise Wilcoxon tests with Bonferroni corrected P-values.

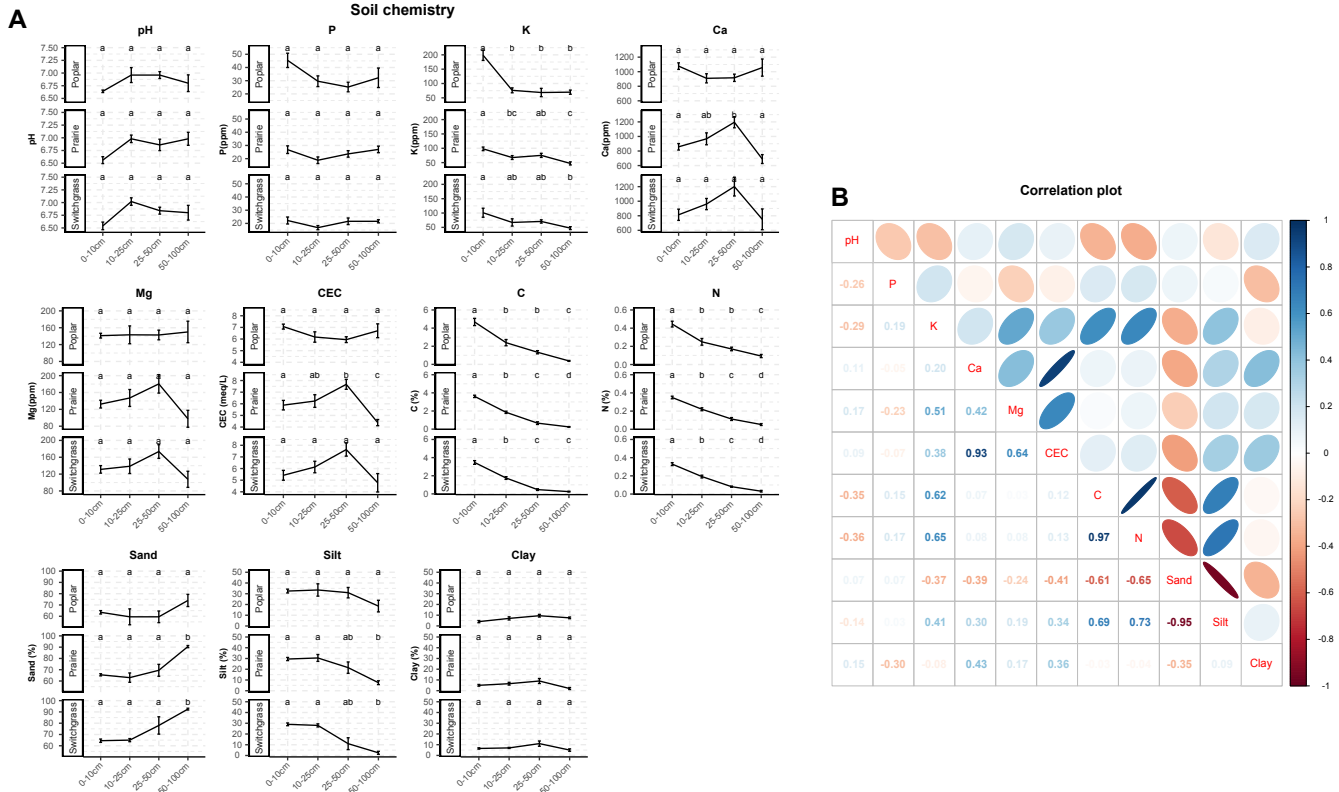

**Figure S4** Neutral models fit line on log10 abundance-occupancy OTU plot. Datasets were subsetted by crop and depth levels: A) poplar fungi, B) poplar prokaryotes, C) prairie fungi, D) prairie prokaryotes. Model fit ( $r^2$ ) and immigration rate ( $m$ ) are also plotted into the graphs for each model. Filled points represent the core while empty points are other OTUs. Proportion (%) of neutral (grey), above (purple), and below (dark purple) model prediction are shown.

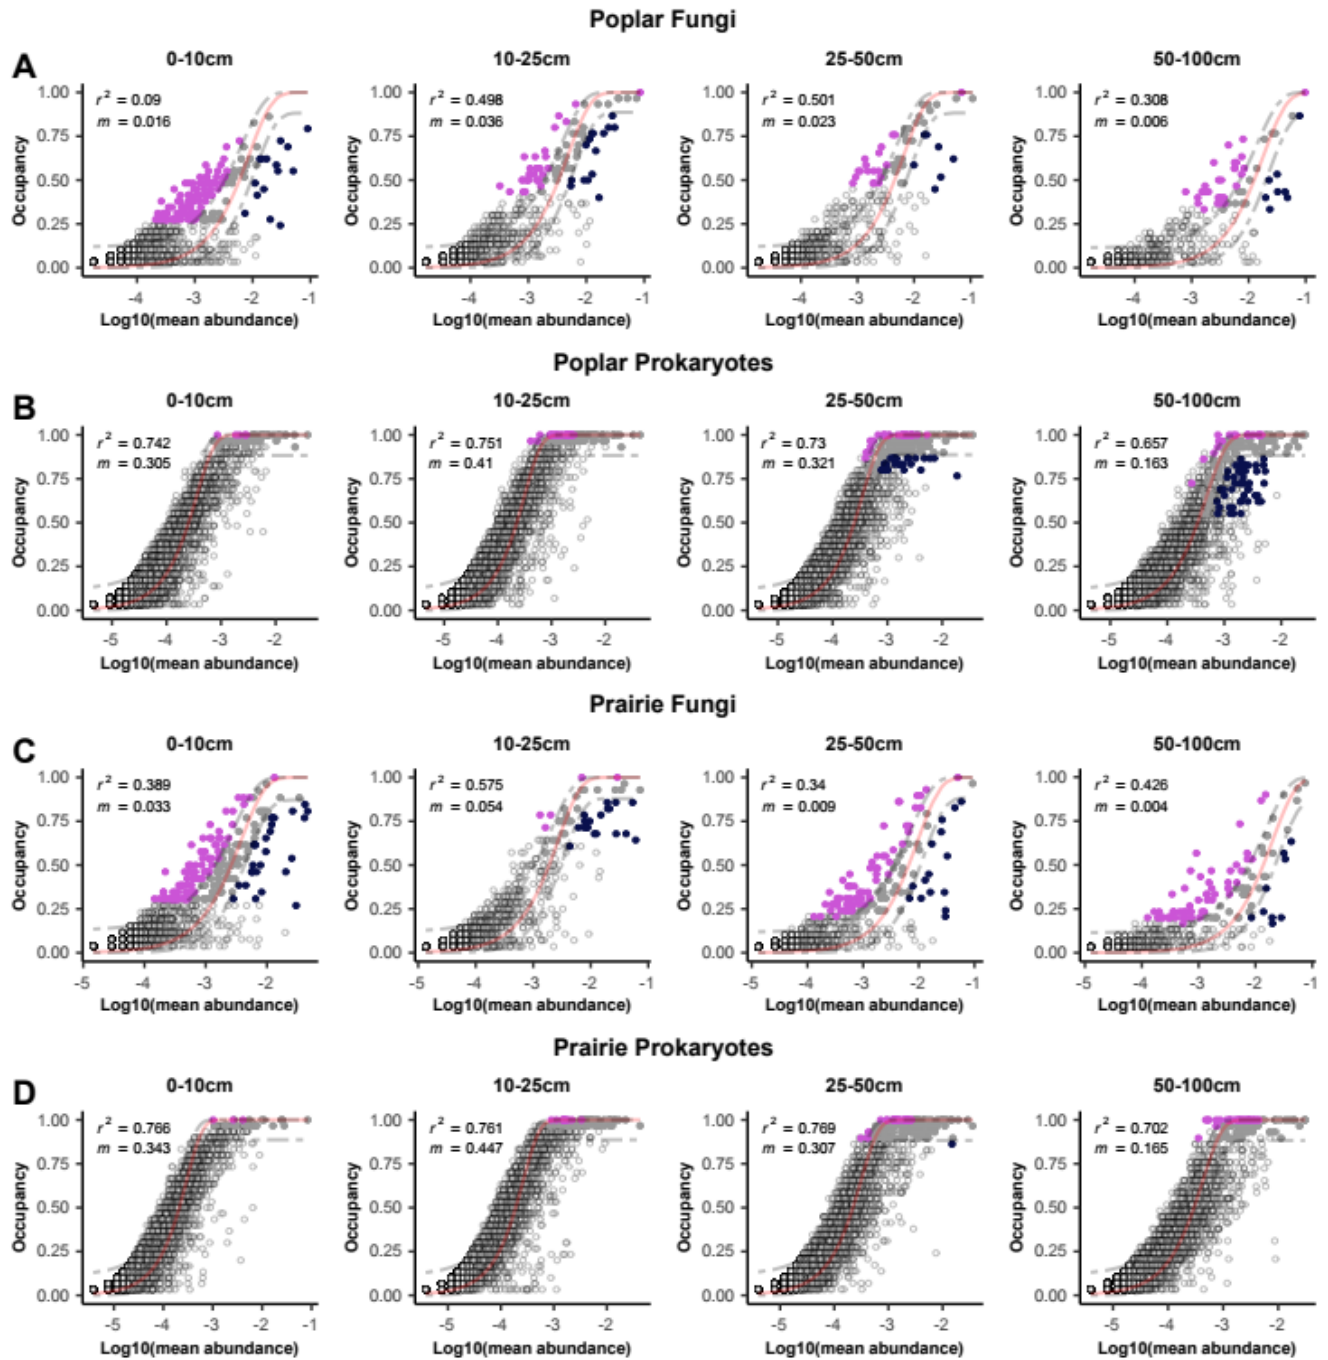

**Figure S5** Proportion of all the neutral, above, and below model prediction OTUs for A) fungal and B) prokaryotic communities.

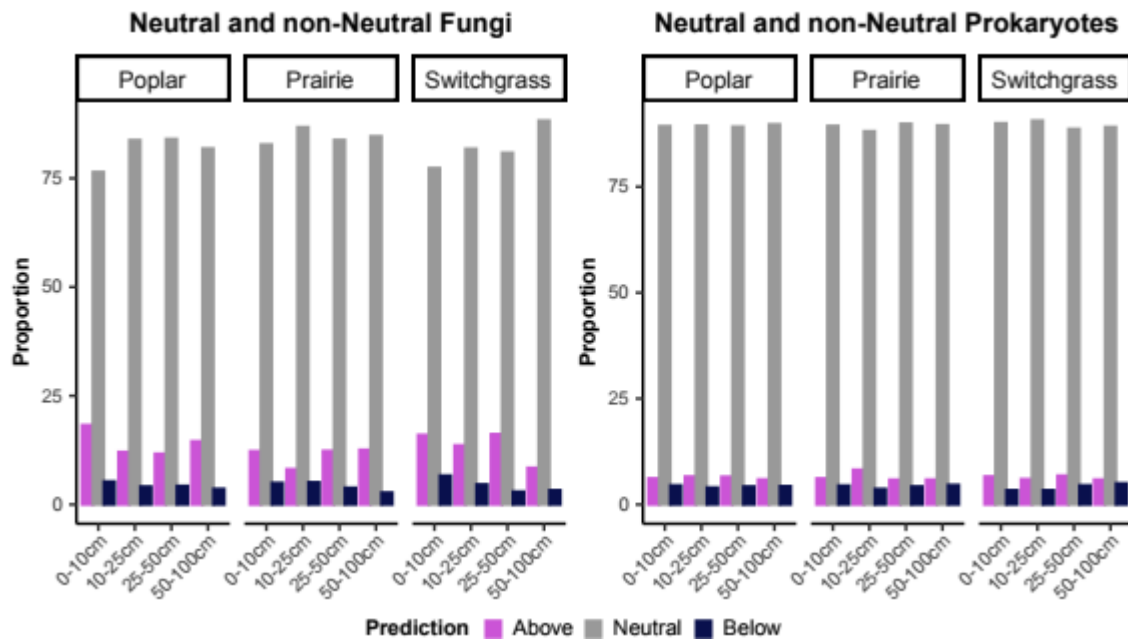

**Figure S6** Balloon plot of relative abundance of all phyla present in the networks. Bubbles represent the cumulative relative abundance of all OTUs for each taxonomic group. Relative abundance value are also reported on top of the bubbles (larger bubbles mean higher relative abundance) and sum up to 100% at each depth. For completeness, unclassified fungi at phylum level are also included in the plot.

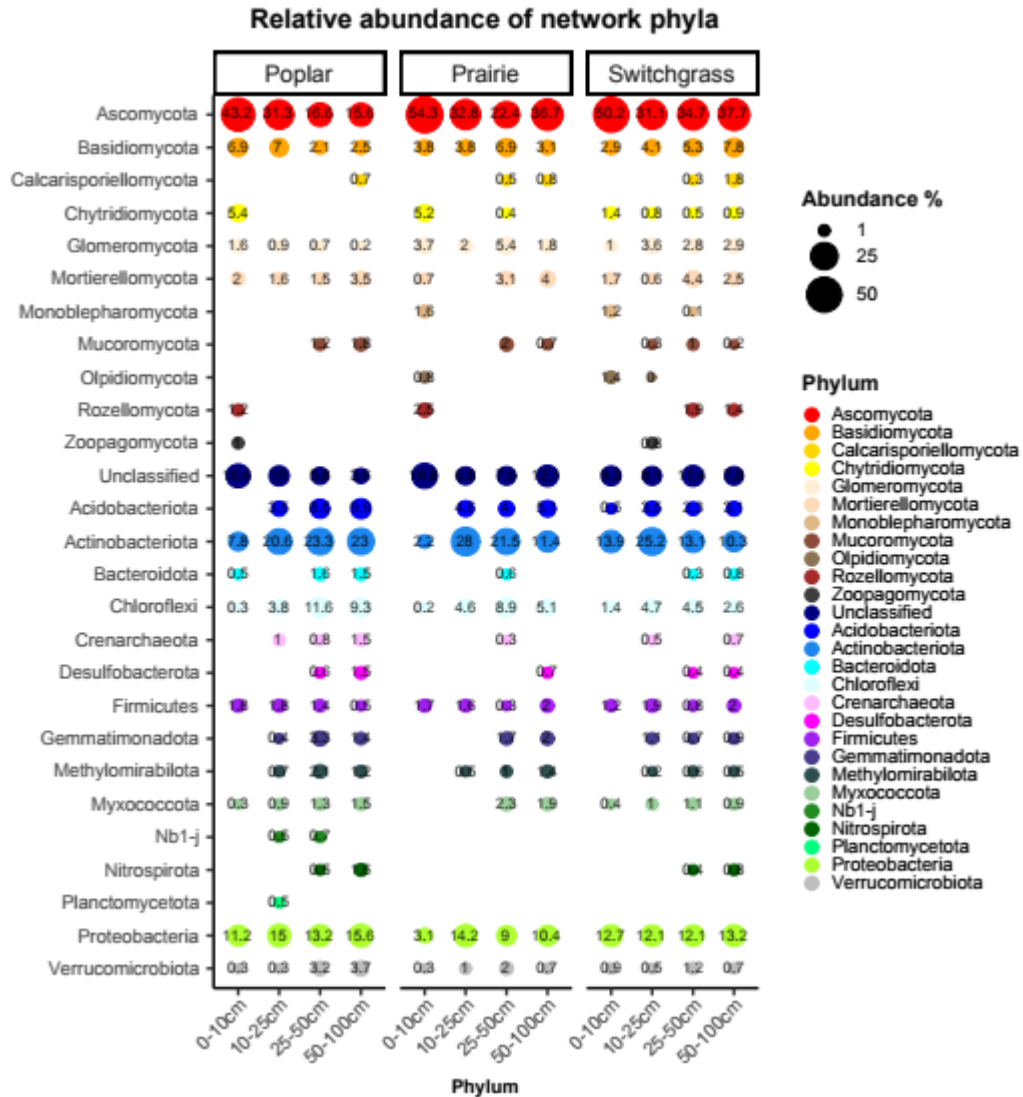

**Figure S7** Heatmap showing the abundance of positive and negative intra- and inter-kingdom root-to-root links (see Material and Methods section in main text). The higher the abundance the more the links are between root OTUs, the lower the abundance the more the links are between soil OTUs.

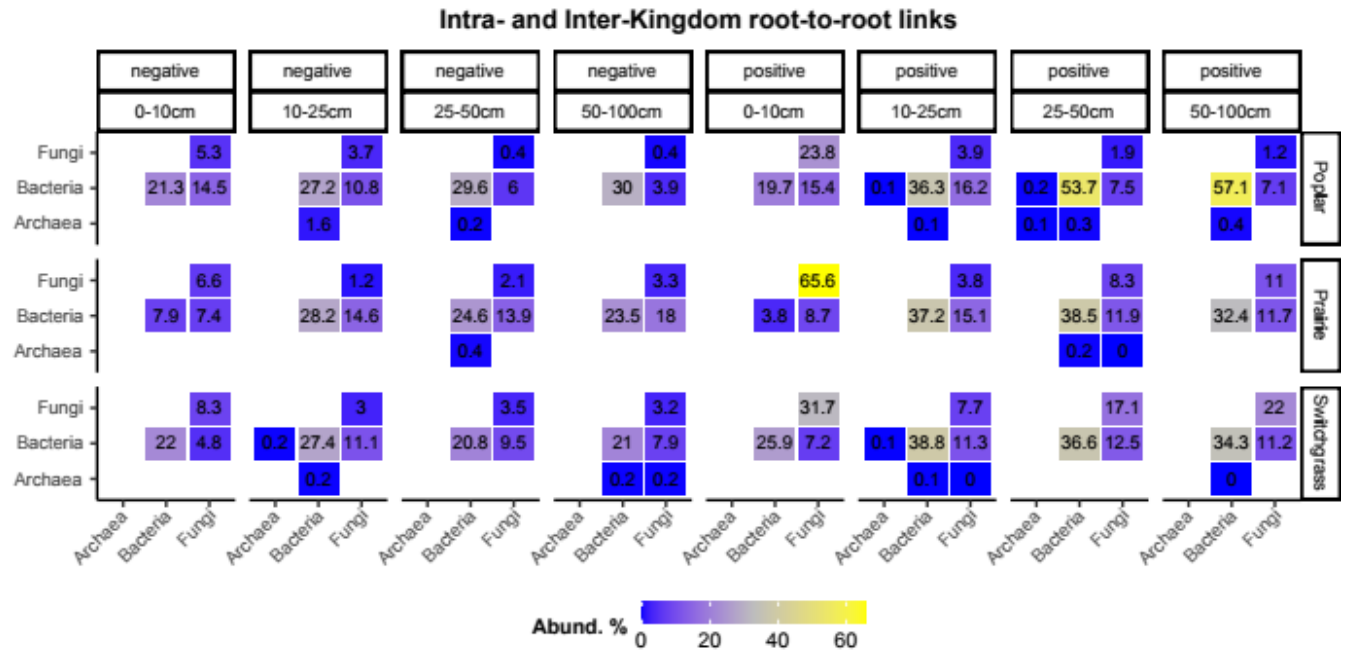

**Figure S8** Heatmap showing the proportions of positive and negative intra- and inter-Phylum links (i.e. connections between OTUs) for each crop and depth level.

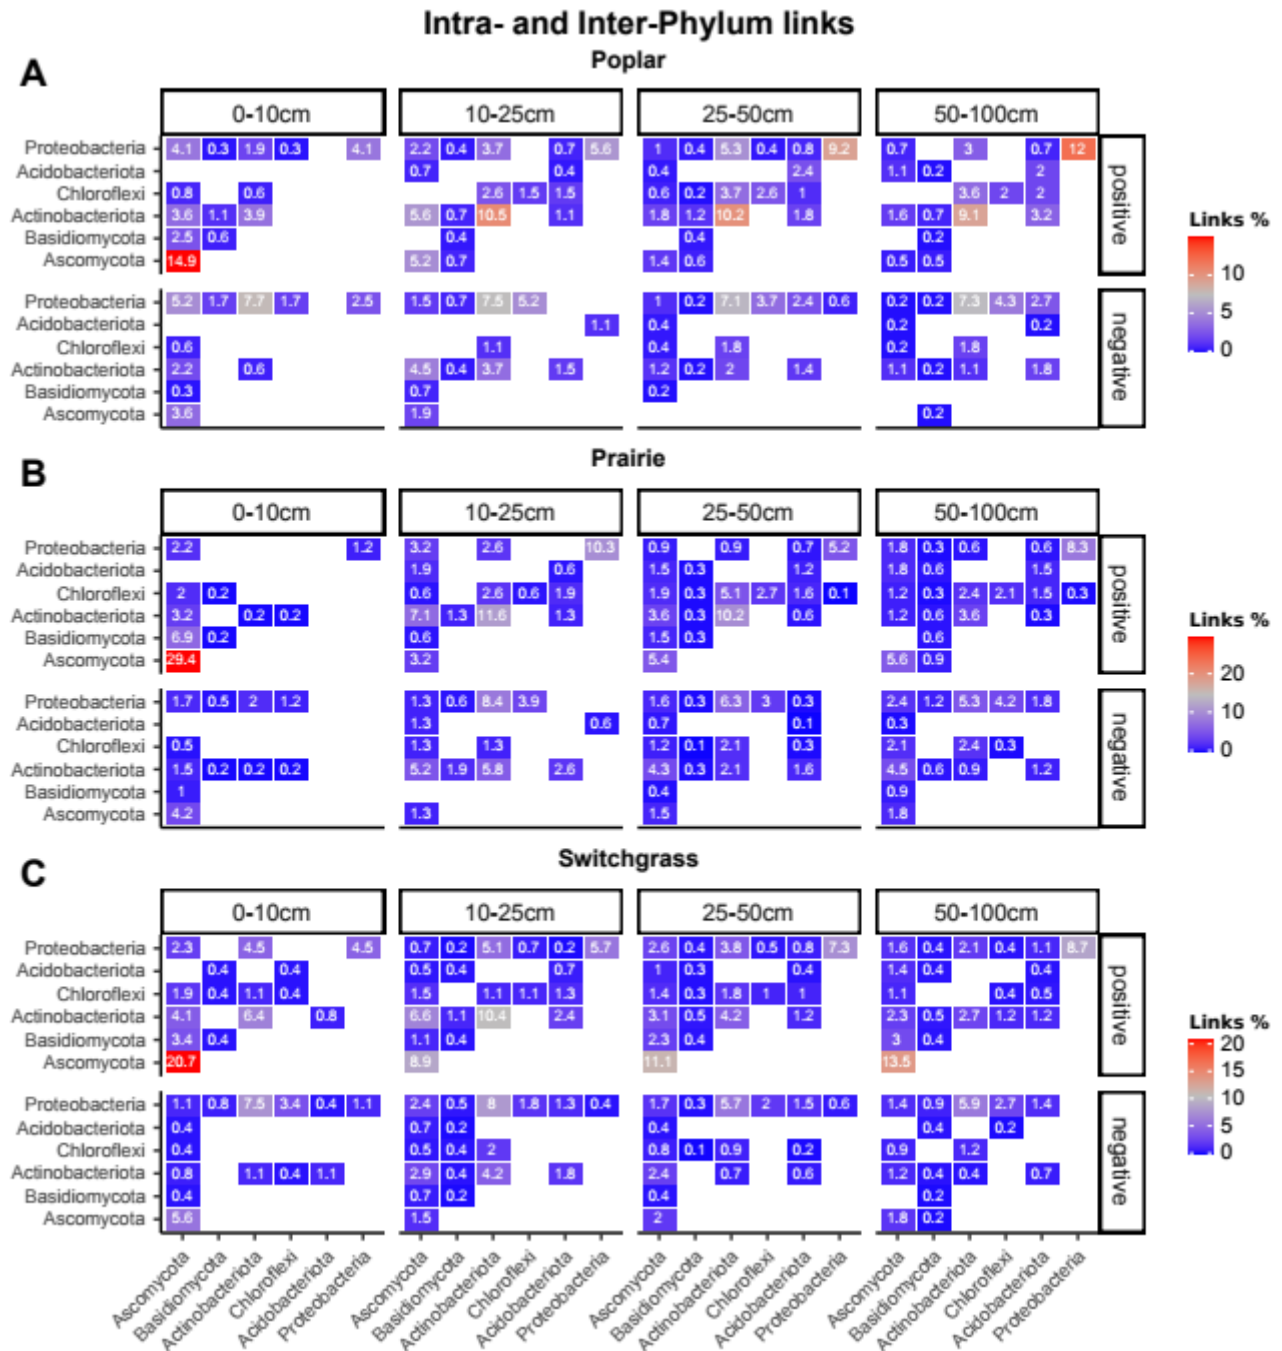



**Figure S9** Heatmap showing the abundance of positive and negative intra- and inter-Phylum root-to-root links. The higher the abundance the more the links are between root OTUs, the lower the abundance the more the links are between soil OTUs.

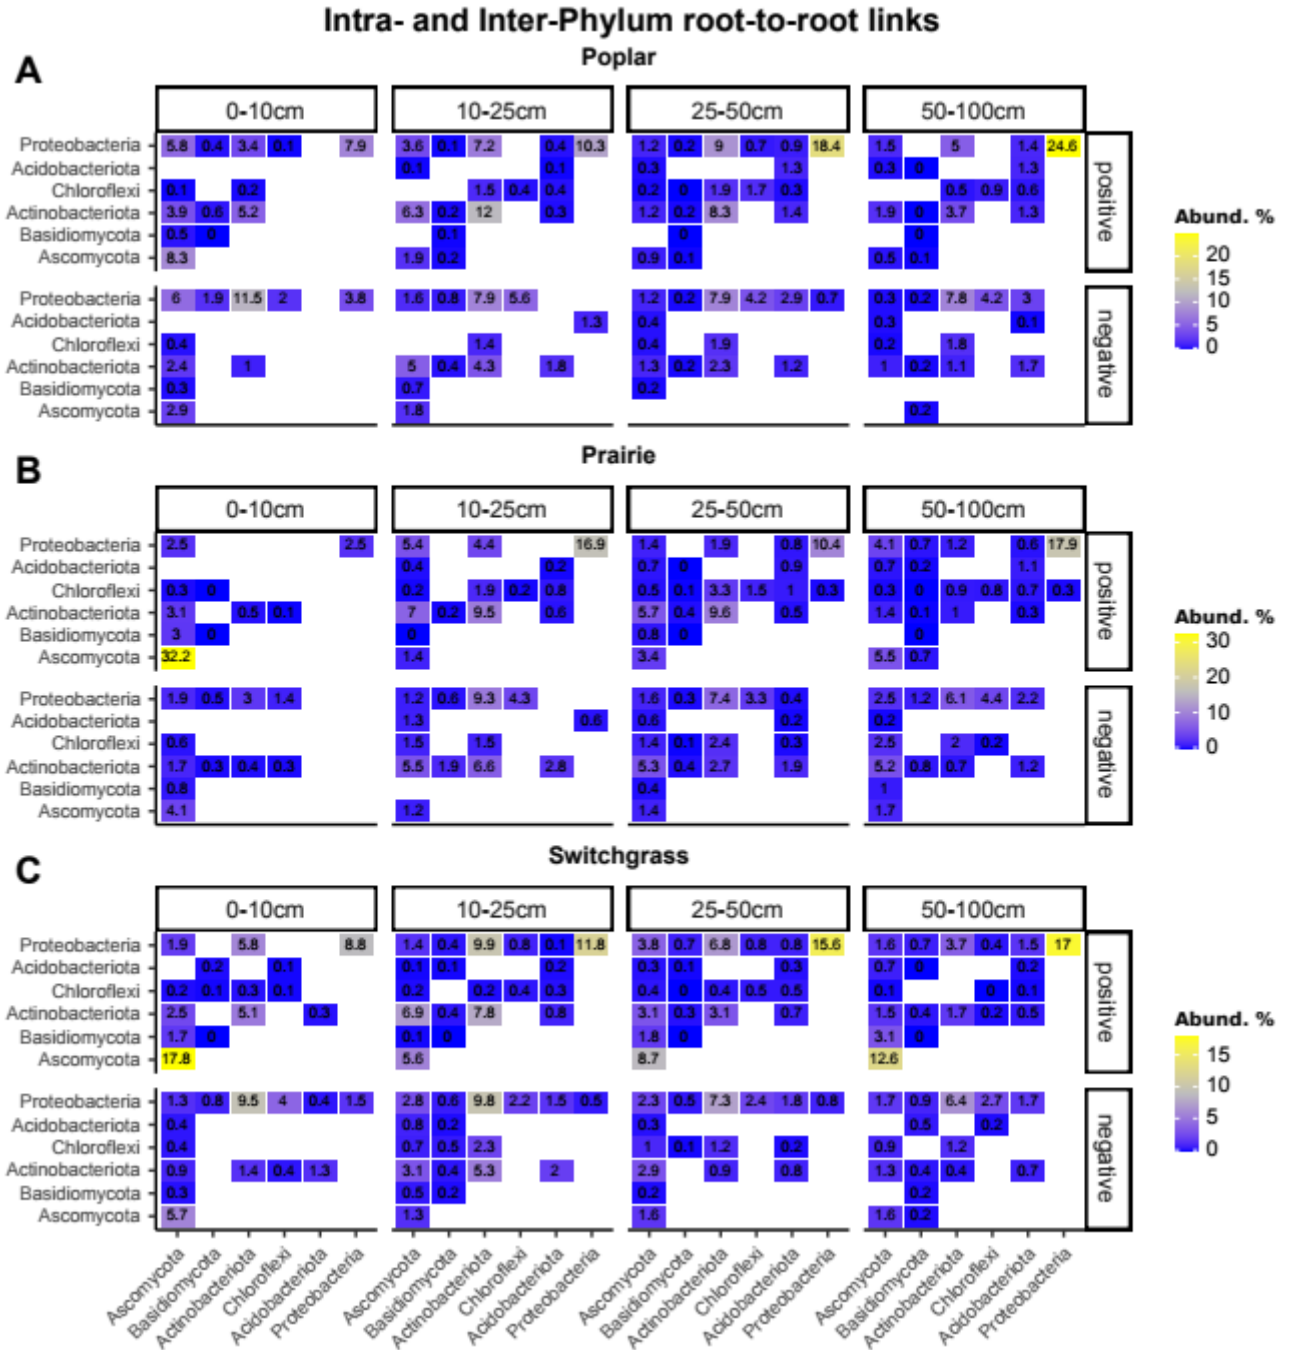

**Table S1** Richness and Shannon index of root and soil samples across depth gradient for fungal and bacterial communities. Differences were tested using ANOVA or Kriskal Wallis tests where the dataset did not meet normality and/or homoscedasticity prerequisites. Signif. Codes: “0.001” (\*\*\*), “0.01” (\*\*), “ ” (not significant).

|                    |                    | Poplar                         |                               | Prairie                        |                               |
|--------------------|--------------------|--------------------------------|-------------------------------|--------------------------------|-------------------------------|
|                    | Factor             | Richness                       | Shannon index                 | Richness                       | Shannon index                 |
| <b>Fungi</b>       | <i>Niche</i>       | 445.98 <sub>(1, 110)</sub> *** | 15.10 <sub>(1, 110)</sub> *** | 132.76 <sub>(1, 105)</sub> *** | 53.23 <sub>(1, 105)</sub> *** |
|                    | <i>Depth</i>       | 71.98 <sub>(3, 110)</sub> ***  | 4.49 <sub>(3, 110)</sub> **   | 81.01 <sub>(3, 105)</sub> ***  | 6.62 <sub>(3, 105)</sub> ***  |
|                    | <i>Niche:Depth</i> | 85.13 <sub>(3, 110)</sub> ***  | 1.93 <sub>(3, 110)</sub>      | 31.13 <sub>(3, 105)</sub> ***  | 1.64 <sub>(3, 109)</sub>      |
| <b>Prokaryotes</b> | <i>Niche</i>       | 270.72 <sub>(1, 109)</sub> *** | 28.25 <sub>(1, 109)</sub> *** | 68.46 <sub>(1, 110)</sub> ***  | 30.84 <sub>(1, 110)</sub> *** |
|                    | <i>Depth</i>       | 49.31 <sub>(3, 109)</sub> ***  | 3.675 <sub>(3, 109)</sub> *   | 27.73 <sub>(3, 110)</sub> ***  | 0.46 <sub>(3, 110)</sub>      |
|                    | <i>Niche:Depth</i> | 76.21 <sub>(3, 109)</sub> ***  | 0.56 <sub>(3, 109)</sub>      | 55.23 <sub>(3, 110)</sub> ***  | 1.91 <sub>(3, 110)</sub>      |

**Table S2** List of all the hub taxa (highly connected, e.g. have many links, OTUs across the whole network) present in the networks. All OTUs were module hubs (OTUs more densely connected to OTUs within a module, compared to other OTUs in the network) beside *Rhizobacter* (see note 1). To identify hubs we used the ratio between within-module ( $Z_i$ ) and between-module connectivity ( $P_i$ ): network hubs ( $Z_i > 2.5$ ,  $P_i > 0.62$ ), module hubs ( $Z_i > 2.5$ ,  $P_i \leq 0.62$ ), connectors ( $Z_i \leq 2.5$ ,  $P_i > 0.62$ ) or peripherals ( $Z_i \leq 2.5$ ,  $P_i \leq 0.62$ ). NA = not assigned to a niche.

| OTU_ID    | Taxonomy                            | Crop        | Depth (cm) | Abundance in root | Niche | Neutral fit | Degree | Betweenness |
|-----------|-------------------------------------|-------------|------------|-------------------|-------|-------------|--------|-------------|
| FOTU_550  | <i>Operculomyces</i> sp.            | Poplar      | 0-10       | 1.68              | NA    | Above       | 9      | 656.22      |
| POTU_12   | <i>Kineosporia</i> sp.              | Poplar      | 0-10       | 91.75             | Root  | Neutral     | 11     | 565.59      |
| POTU_22   | <i>Gaiella</i> sp.                  | Poplar      | 25-50      | 19.76             | Soil  | Above       | 9      | 666.68      |
| POTU_37   | Gemmatimonadetes                    | Poplar      | 25-50      | 2.03              | Soil  | Neutral     | 14     | 876.38      |
| POTU_26   | <i>Rhizobacter</i> sp.              | Poplar      | 25-50      | 96.83             | Root  | Neutral     | 23     | 2456.14     |
| POTU_6310 | Actinobacteria                      | Poplar      | 25-50      | 5.05              | Soil  | Below       | 18     | 1721.41     |
| POTU_8    | <i>Actinocorallia</i> sp.           | Poplar      | 50-100     | 97.17             | Root  | Neutral     | 13     | 757.57      |
| POTU_26   | <i>Rhizobacter</i> sp.              | Poplar      | 50-100     | 93.54             | Root  | Above       | 28     | 2081.37     |
| POTU_1451 | Chloroflexi                         | Poplar      | 50-100     | 1.07              | Soil  | Below       | 14     | 1135.34     |
| POTU_117  | <i>Chryseolinea</i> sp.             | Poplar      | 50-100     | 98.92             | Root  | Below       | 12     | 492.52      |
| POTU_26   | <i>Rhizobacter</i> sp.              | Poplar      | 0-10       | 87.31             | Root  | Neutral     | 31     | 3451.95     |
| FOTU_551  | Glomeromycotina                     | Prairie     | 0-10       | 88.96             | NA    | Neutral     | 13     | 1238.71     |
| POTU_5    | Chloroflexi                         | Prairie     | 0-10       | 11.09             | Soil  | Neutral     | 21     | 2953.49     |
| POTU_26   | <i>Rhizobacter</i> sp. <sup>1</sup> | Prairie     | 10-25      | 91.84             | Root  | Neutral     | 13     | 845.98      |
| POTU_35   | <i>Actinoplanes</i> sp.             | Prairie     | 25-50      | 97.01             | Root  | Neutral     | 16     | 1013.25     |
| POTU_95   | <i>Pseudonocardia</i> sp.           | Prairie     | 25-50      | 44.71             | Soil  | Neutral     | 14     | 1450.39     |
| POTU_2    | <i>Bradyrhizobium</i> sp.           | Prairie     | 50-100     | 95.97             | Root  | Neutral     | 20     | 1309.48     |
| POTU_131  | <i>Gaiella</i> sp.                  | Prairie     | 50-100     | 11.85             | Soil  | Neutral     | 10     | 563.47      |
| POTU_752  | Chloroflexi                         | Prairie     | 50-100     | 6.39              | Soil  | Neutral     | 14     | 1054.59     |
| POTU_26   | <i>Rhizobacter</i> sp.              | Prairie     | 50-100     | 96.28             | Root  | Above       | 22     | 1623.3      |
| POTU_98   | <i>Candidatus udaeobacter</i> sp.   | Prairie     | 50-100     | 10.92             | Soil  | Above       | 15     | 769.81      |
| FOTU_292  | <i>Cyphellophora</i> sp.            | Switchgrass | 0-10       | 84.64             | NA    | Above       | 14     | 971.05      |
| POTU_15   | <i>Acidibacter</i> sp.              | Switchgrass | 0-10       | 95.55             | Root  | Neutral     | 10     | 526.27      |
| FOTU_8    | <i>Acremonium</i> sp.               | Switchgrass | 10-25      | 0.52              | Soil  | Below       | 15     | 1408.51     |
| POTU_111  | Rokubacterales                      | Switchgrass | 10-25      | 15.87             | Soil  | Above       | 13     | 927.1       |
| POTU_22   | <i>Gaiella</i> sp.                  | Switchgrass | 10-25      | 10.61             | Soil  | Neutral     | 19     | 1542.64     |
| POTU_35   | Micromonosporaceae                  | Switchgrass | 10-25      | 92.64             | Root  | Neutral     | 13     | 1092.88     |
| POTU_39   | <i>Devosia</i> sp.                  | Switchgrass | 10-25      | 90.42             | Root  | Neutral     | 17     | 723.22      |
| FOTU_8    | <i>Acremonium</i> sp.               | Switchgrass | 25-50      | 2.17              | Soil  | Above       | 25     | 4968.24     |
| FOTU_25   | Mucromycotina                       | Switchgrass | 25-50      | 0.26              | Soil  | Below       | 12     | 1402.67     |
| FOTU_51   | <i>Cladosporium</i> sp.             | Switchgrass | 25-50      | 27.44             | NA    | Above       | 11     | 861.98      |
| POTU_22   | <i>Gaiella</i> sp.                  | Switchgrass | 25-50      | 10.74             | Soil  | Below       | 27     | 5148.61     |
| POTU_18   | Acidobacteriota                     | Switchgrass | 25-50      | 18.3              | Soil  | Neutral     | 21     | 4427.77     |
| FOTU_8    | <i>Acremonium</i> sp.               | Switchgrass | 50-100     | 1.25              | Soil  | Neutral     | 17     | 1264.05     |
| FOTU_1137 | <i>Pezizula</i> sp.                 | Switchgrass | 50-100     | 83.13             | NA    | Above       | 10     | 1663.26     |
| FOTU_1446 | Helotiales                          | Switchgrass | 50-100     | 93.02             | NA    | Neutral     | 12     | 1894.16     |
| POTU_111  | Rokubacterales                      | Switchgrass | 50-100     | 8.87              | Soil  | Above       | 16     | 972.58      |
| POTU_352  | <i>Nitrospira</i> sp.               | Switchgrass | 50-100     | 1.93              | Soil  | Below       | 13     | 1075.99     |

(1) *Rhizobacter* was the only network hub, all others were module hubs.

**Table S3** Microbial networks properties. Network properties that were able to best predict differences across depths in all crops (Random Forest feature selection method) are highlighted in bold.

| Network properties         | Poplar  |         |         |          | Prairie |         |         |          | Switchgrass |         |         |          |
|----------------------------|---------|---------|---------|----------|---------|---------|---------|----------|-------------|---------|---------|----------|
|                            | 0-10cm  | 10-25cm | 25-50cm | 50-100cm | 0-10cm  | 10-25cm | 25-50cm | 50-100cm | 0-10cm      | 10-25cm | 25-50cm | 50-100cm |
| Nodes                      | 197     | 161     | 216     | 193      | 219     | 110     | 252     | 174      | 152         | 233     | 360     | 234      |
| links                      | 363     | 267     | 509     | 440      | 405     | 155     | 667     | 337      | 266         | 548     | 1159    | 563      |
| Positive links             | 237     | 159     | 344     | 295      | 328     | 93      | 420     | 193      | 185         | 350     | 810     | 390      |
| <b>Negative links</b>      | 126     | 108     | 165     | 145      | 77      | 62      | 247     | 144      | 81          | 198     | 349     | 173      |
| Positive/negative links    | 1.881   | 1.472   | 2.085   | 2.034    | 4.26    | 1.5     | 1.7     | 1.34     | 2.284       | 1.768   | 2.321   | 2.254    |
| Core OTUs – Above          | 50.761  | 34.783  | 21.296  | 24.87    | 44.292  | 14.545  | 38.889  | 48.276   | 32.237      | 24.464  | 43.056  | 20.513   |
| Core OTUs – Neutral        | 41.624  | 55.901  | 61.574  | 45.596   | 42.922  | 67.273  | 54.762  | 46.552   | 51.974      | 65.236  | 42.5    | 56.838   |
| Core OTUs – Below          | 7.614   | 9.317   | 17.13   | 29.534   | 12.785  | 18.182  | 6.349   | 5.172    | 15.789      | 10.3    | 14.444  | 22.65    |
| All OTUs – Above           | 7.83    | 7.281   | 7.113   | 6.671    | 7.093   | 8.199   | 6.607   | 6.478    | 8.21        | 7.086   | 7.982   | 6.101    |
| All OTUs – Above           | 87.55   | 88.703  | 88.634  | 89.06    | 88.366  | 87.928  | 89.184  | 89.074   | 87.856      | 89.358  | 87.692  | 89.056   |
| All OTUs – Below           | 4.62    | 4.016   | 4.253   | 4.27     | 4.542   | 3.873   | 4.209   | 4.448    | 3.934       | 3.556   | 4.326   | 4.842    |
| Transitivity               | 0.195   | 0.208   | 0.171   | 0.264    | 0.197   | 0.287   | 0.182   | 0.224    | 0.226       | 0.201   | 0.118   | 0.185    |
| <b>Modularity</b>          | 0.526   | 0.487   | 0.524   | 0.546    | 0.593   | 0.569   | 0.481   | 0.527    | 0.542       | 0.495   | 0.495   | 0.55     |
| Modules                    | 42      | 49      | 29      | 33       | 39      | 35      | 32      | 36       | 34          | 33      | 14      | 31       |
| <b>Average module size</b> | 4.69    | 3.286   | 7.448   | 5.848    | 5.615   | 3.143   | 7.875   | 4.833    | 4.471       | 7.061   | 25.714  | 7.548    |
| Module SD                  | 8.348   | 5.53    | 12.24   | 11.525   | 9.138   | 4.797   | 14.712  | 9.016    | 7.597       | 12.715  | 37.36   | 14.137   |
| <b>Average degree</b>      | 3.685   | 3.317   | 4.713   | 4.56     | 3.699   | 2.818   | 5.294   | 3.874    | 3.5         | 4.704   | 6.439   | 4.812    |
| Degree SD                  | 3.902   | 3.642   | 3.83    | 4.008    | 3.185   | 2.903   | 4.167   | 3.644    | 3.428       | 3.988   | 4.218   | 3.74     |
| Average betweenes          | 182.716 | 109.745 | 240.435 | 189.964  | 256.909 | 83.564  | 277.972 | 170.695  | 143.612     | 272.026 | 477.608 | 276.722  |
| Betweenness SD             | 346.195 | 239.039 | 333.256 | 307.191  | 407.345 | 152.292 | 382.997 | 276.24   | 279.654     | 350.524 | 596.318 | 349.518  |
| Path length                | 3.794   | 3.559   | 3.718   | 3.742    | 4.304   | 3.907   | 3.683   | 3.768    | 3.862       | 3.916   | 3.752   | 3.95     |
| Edge density               | 0.019   | 0.021   | 0.022   | 0.024    | 0.017   | 0.026   | 0.021   | 0.022    | 0.023       | 0.02    | 0.018   | 0.021    |
| Network diameter           | 10      | 8       | 9       | 8        | 10      | 8       | 10      | 11       | 9           | 10      | 10      | 9        |
| <b>Module hubs</b>         | 2       | 0       | 4       | 4        | 2       | 1       | 2       | 5        | 2           | 5       | 5       | 5        |
| Network hubs               | 1       | 0       | 0       | 0        | 0       | 0       | 0       | 0        | 0           | 0       | 0       | 0        |
| Connctors                  | 19      | 19      | 24      | 11       | 17      | 5       | 37      | 18       | 11          | 25      | 32      | 12       |
| Peripherals                | 175     | 142     | 188     | 178      | 200     | 104     | 211     | 151      | 139         | 203     | 323     | 217      |
| Fungal OTUs                | 144     | 75      | 55      | 51       | 195     | 47      | 122     | 96       | 93          | 110     | 213     | 139      |
| Bacterial OTUs             | 53      | 85      | 159     | 140      | 24      | 63      | 129     | 78       | 59          | 122     | 147     | 94       |
| Archaeal OTUs              | 0       | 1       | 2       | 2        | 0       | 0       | 1       | 0        | 0           | 1       | 0       | 1        |
| Positive interkingdom OTUs | 49      | 41      | 53      | 42       | 45      | 26      | 89      | 46       | 28          | 80      | 157     | 78       |
| Negative interkingdom OTUs | 46      | 31      | 28      | 18       | 25      | 21      | 88      | 56       | 11          | 56      | 96      | 43       |
| Root indicators            | 47      | 49      | 62      | 63       | 31      | 43      | 61      | 40       | 47          | 67      | 88      | 71       |
| Soil indicators            | 40      | 65      | 107     | 91       | 36      | 36      | 94      | 59       | 36          | 79      | 90      | 53       |
| Poplar indicators          | 7       | 9       | 6       | 5        | 2       | 2       | 5       | 3        | 3           | 3       | 5       | 1        |
| Prairie indicators         | 1       | 1       | 2       | 1        | 3       | 3       | 3       | 3        | 1           | 3       | 3       | 3        |
| Switchgrass indicators     | 2       | 1       | 1       | 2        | 2       | 1       | 4       | 3        | 7           | 8       | 10      | 11       |
| 10cm indicators            | 8       | 2       | 2       | 0        | 7       | 1       | 4       | 3        | 8           | 3       | 4       | 1        |
| 25cm indicators            | 2       | 2       | 1       | 1        | 2       | 1       | 2       | 1        | 1           | 2       | 2       | 0        |
| 50cm indicators            | 0       | 0       | 0       | 0        | 0       | 0       | 0       | 0        | 0           | 0       | 0       | 0        |
| 100cm indicators           | 3       | 3       | 4       | 9        | 1       | 1       | 5       | 6        | 1           | 2       | 5       | 13       |
